# Supplementary material
Source: bioRxiv or medRxiv preprint supplement (https://www.biorxiv.org/highwire/filestream/44946/field_highwire_adjunct_files/11/151126-4.pdf)

Chr.1

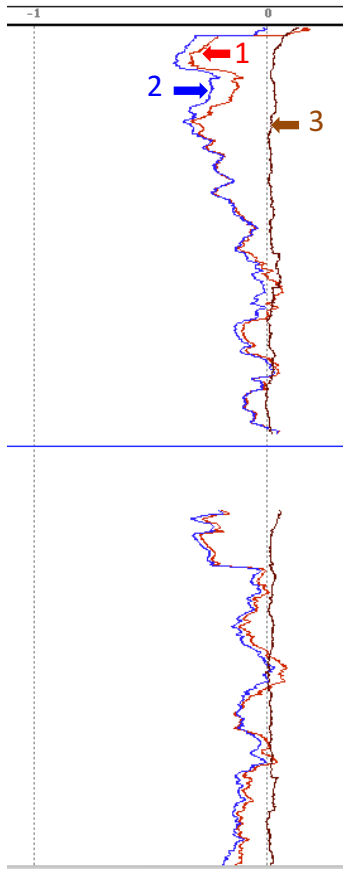

Chr.18

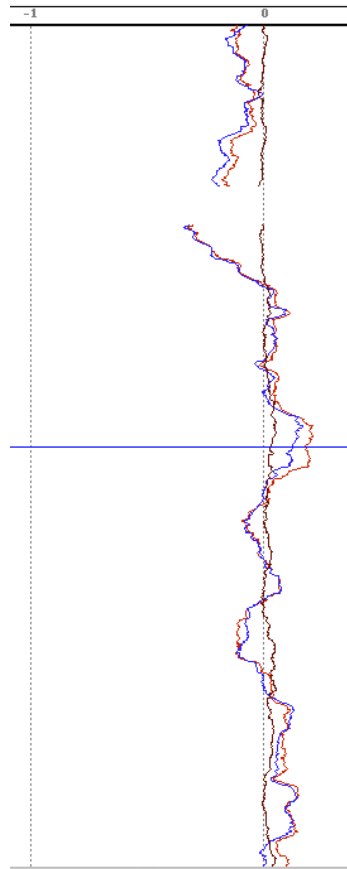

Chr.19

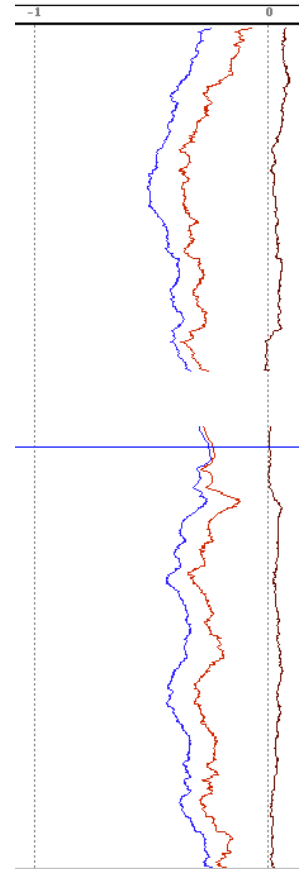

Supplement: Supplementary file [file 151126-4.pdf]
